# Supplementary material for: Understanding the aetiology and resolution of chronic otitis media from animal and human studies
Source: PubMed Central journal article supplement (PMC5719252; doi:10.1242/dmm.029983), 2017-11-01
Supplement: dmm-10-029983-s1.pdf [file dmm-10-029983-s1.pdf]

### Supplementary Table S1

Current genetic mutant mouse models of chronic otitis media (OM). PCD = primary ciliary dyskinesia

| mouse gene | reference | human syndrome or condition | adult mouse phenotypes additional to otitis media | craniofacial abnormality | Eustachian tube | bullae | bullae bacteria | inner ear | comment |
|------------|-----------|-----------------------------|---------------------------------------------------|--------------------------|-----------------|--------|-----------------|-----------|---------|
|------------|-----------|-----------------------------|---------------------------------------------------|--------------------------|-----------------|--------|-----------------|-----------|---------|

| Down Syndrome      |                       |               |                                                         |                     |  |                                                           |                                                                          |                                                                                  |  |
|--------------------|-----------------------|---------------|---------------------------------------------------------|---------------------|--|-----------------------------------------------------------|--------------------------------------------------------------------------|----------------------------------------------------------------------------------|--|
| Ts65Dn Trisomy     | (Han et al., 2009)    | Down syndrome | behavioural and cognitive deficits, short narrow palate | short narrow palate |  | increase in goblet cells, effusion, fibrous proliferation | <i>Staph. coagulase-negative, Bordetella avium, Burkholderia cepacia</i> | labyrinth serous effusion; hair cells, stria vascularis & spiral ganglion normal |  |
| Dp(16)1Yey Trisomy | (Bhutta et al., 2013) | Down syndrome |                                                         |                     |  | thickened mucoperiosteum, polyps                          |                                                                          |                                                                                  |  |

| Primary Ciliary Dyskinesia (PCD) |                              |                                  |                                                                                                                  |            |  |                     |  |  |                                                                                          |
|----------------------------------|------------------------------|----------------------------------|------------------------------------------------------------------------------------------------------------------|------------|--|---------------------|--|--|------------------------------------------------------------------------------------------|
| <i>Mdnah5</i> -/-                | (Ibanez-Tallon et al., 2002) | PCD                              | hydrocephaly, growth retardation, mortality 2-3 weeks, situs inversus                                            | domed head |  |                     |  |  |                                                                                          |
| <i>Dnahc11</i> iv/iv             | (Lucas et al., 2012)         | PCD                              | situs inversus, rhinitis, sinusitis                                                                              |            |  |                     |  |  | immotile tracheal cilia                                                                  |
| <i>Cby</i> -/-                   | (Voronina et al., 2009)      | PCD                              | rhinitis, growth retardation, post natal mortality by d30, anaemia, reduced subcutaneous fat, no situs inversus. |            |  |                     |  |  | cilia deficiency and motility deficits, experimental challenge with <i>P. aeruginosa</i> |
| <i>Odf2</i> ΔEx6,7/ΔEx6,7        | (Kunimoto et al., 2012)      | PCD                              | rhinitis, stertor, growth retardation, infertility, hydrocephaly variable                                        |            |  |                     |  |  |                                                                                          |
| <i>Tll1</i> -/-                  | (Vogel et al., 2012)         | PCD not known with this mutation | PCD rhinosinusitis, male infertility, normal lungs,                                                              |            |  | suppurative exudate |  |  | no hydrocephalus, no situs inversus                                                      |

|                  |                      |     |                                                                               |               |                                   |                                                                                                                                                                            |                                                                                                                    |                                                    |  |
|------------------|----------------------|-----|-------------------------------------------------------------------------------|---------------|-----------------------------------|----------------------------------------------------------------------------------------------------------------------------------------------------------------------------|--------------------------------------------------------------------------------------------------------------------|----------------------------------------------------|--|
| <i>Spag6</i> -/- | (Li et al., 2014)    | PCD | hydrocephalus, sperm motility defects, morbidity and mortality after 6 months |               | normal acute angle to nasopharynx | no increase in goblet cell or mucin expression, loss of bulla cilia & disordered arrays; by 6 months cholesterol crystals, tympanosclerosis, mucosal capillary hyperplasia | PCR for human otopathogens <i>H. infle</i> , <i>S. pneumo</i> , negative <i>M. catar</i> positive by PCR & culture |                                                    |  |
| <i>Ulk4</i> -/-  | (Vogel et al., 2012) | PCD | PCD, rhinosinusitis, hydrocephalus, mortality < 4 months                      | hydrocephalus |                                   | suppurative OM                                                                                                                                                             |                                                                                                                    |                                                    |  |
| <i>Kif27</i> -/- | (Vogel et al., 2012) | PCD | PCD, rhinosinusitis, hydrocephalus, mortality < 8 weeks                       | hydrocephalus |                                   | suppurative OM                                                                                                                                                             |                                                                                                                    |                                                    |  |
| <i>Stk36</i> -/- | (Vogel et al., 2012) | PCD | PCD hydrocephalus, morbidity mortality < 6 weeks                              | hydrocephalus |                                   | suppurative OM without rhinosinusitis                                                                                                                                      |                                                                                                                    | inflammation extends into inner ear (and meninges) |  |
| <i>Dpcd</i> -/-  | (Vogel et al., 2012) | PCD | PCD, rhinosinusitis, hydrocephalus, male infertility                          | hydrocephalus |                                   | suppurative OM                                                                                                                                                             |                                                                                                                    |                                                    |  |

| Mucopolysaccharidosis  |                                            |                                                         |                                                                         |            |  |                                                                                     |  |                                             |                                  |
|------------------------|--------------------------------------------|---------------------------------------------------------|-------------------------------------------------------------------------|------------|--|-------------------------------------------------------------------------------------|--|---------------------------------------------|----------------------------------|
| <i>Ids KO</i>          | ( <a href="#">Hong et al., 2012</a> )      | mucopolysaccharidosis type II, Hunter syndrome X-linked |                                                                         |            |  | TM thickened, microCT opacity, bulla exudate                                        |  | minimal loss of hair cells, reduced ganglia | enzyme replacement therapy study |
| <i>Naglu -/-</i>       | ( <a href="#">Heldermon et al., 2007</a> ) | mucopolysaccharidosis type III, Sanfilippo syndrome     | behavioural and sensory deficits, reduced life span                     |            |  | lysosomal storage in mucosa, osteocytes, chondrocytes & inflammatory cells          |  | storage disease present in spiral ligament  |                                  |
| <i>Idua -/-</i>        | ( <a href="#">Schachern et al., 2007</a> ) | mucopolysaccharidosis type I                            |                                                                         |            |  | mucosa thickened and granulation tissue formation                                   |  | storage disease present in spiral ligament  |                                  |
| <i>Gus mps2J/mps2J</i> | ( <a href="#">Vogler et al., 2001</a> )    | mucopolysaccharidosis type VII                          | reduced survival, reduced lifespan, skeletal dysostosis, thickened tail | blunt nose |  | storage disease in mucosal connective tissue, osteocytes chondrocytes, thickened TM |  |                                             |                                  |

| 22q11.2 Deletion Syndrome (DiGeorge Syndrome or Velo-Cardio-Facial Syndrome) |                      |                           |                                                             |               |                                  |                                                                           |                                                                 |                            |  |
|------------------------------------------------------------------------------|----------------------|---------------------------|-------------------------------------------------------------|---------------|----------------------------------|---------------------------------------------------------------------------|-----------------------------------------------------------------|----------------------------|--|
| <i>Df1/+</i>                                                                 | (Fuchs et al., 2013) | 22q11.2 Deletion Syndrome | cardiovascular abnormalities, thymic or parathyroid defects | none reported | levator veli palatini hypoplasia | thickened mucosa, vascularization, reduced numbers of ciliated cells      | <i>E. coli</i> , <i>Lactococcus lactis</i> , <i>Pantoea sp.</i> | no hair cell loss detected |  |
| <i>Tbx/+</i>                                                                 | Fuchs et al., 2015   | 22q11.2 Deletion Syndrome | cardiovascular abnormalities                                |               | levator veli palatini hypoplasia | mucosa proliferation, vascularization, effusion, increase in goblet cells |                                                                 |                            |  |

| Hypohidrotic ectodermal dysplasia        |                                |                                                                                    |                                                                                                        |            |                    |                                                    |                                                                                                              |        |                             |
|------------------------------------------|--------------------------------|------------------------------------------------------------------------------------|--------------------------------------------------------------------------------------------------------|------------|--------------------|----------------------------------------------------|--------------------------------------------------------------------------------------------------------------|--------|-----------------------------|
| <i>Eda Ta/Ta, Eda Ta/Y, Edar dlJ/dlJ</i> | (Azar et al., 2016)            | Hypohidrotic Ectodermal dysplasia (HED) OMIM <i>EDA</i> 300451; <i>EDAR</i> 604095 | rhinitis, nasopharyngitis, otitis media, HED, loss of nasal and nasopharyngeal submucosal glands       |            | secondary dilation | mucosal thickening, polyps, foreign body granuloma | <i>Gemella sp.</i> <i>Enterococcus sp.</i> <i>E. coli</i> , <i>Staphylococcus sp.</i> , <i>Staph. aureus</i> |        |                             |
| <i>IKB αΔN</i>                           | (Schmidt-Ullrich et al., 2001) |                                                                                    | HED, immune defects lymph nodes absent, leukocytosis, impaired macrophage function, growth retardation | domed head |                    | mucosal thickening                                 | <i>Staphylococcus aureus</i>                                                                                 | normal | <i>Leishmania</i> challenge |

| Other syndromes     |                         |                                                                                                                                      |                                                                                                                                             |                                            |                                                                               |                                                                                                                  |                                                                                                                                           |                                      |  |                                                                                                                      |
|---------------------|-------------------------|--------------------------------------------------------------------------------------------------------------------------------------|---------------------------------------------------------------------------------------------------------------------------------------------|--------------------------------------------|-------------------------------------------------------------------------------|------------------------------------------------------------------------------------------------------------------|-------------------------------------------------------------------------------------------------------------------------------------------|--------------------------------------|--|----------------------------------------------------------------------------------------------------------------------|
| <i>Porcn +/-del</i> | (Biechele et al., 2013) | Focal Dermal Hypoplasia (Goltz Syndrome, OMIM#305600)                                                                                | rhinitis, bronchopneumonia, mild hydrocephalus, dermal and skeletal defects                                                                 |                                            |                                                                               |                                                                                                                  |                                                                                                                                           | bullae exudate                       |  | cilia defect suspected                                                                                               |
| <i>Chd7 Ome/+</i>   | (Tian et al., 2012)     | CHARGE syndrome abnormalities of eye, heart, choana, genitalia, middle and inner ear                                                 | keratitis sicca, growth retardation, circling behaviour                                                                                     | skull height and nose length ratios higher | increased lateral angulation                                                  | increased goblet cells, reduced ciliated cells                                                                   | Streptococci present in mutants and wild-type. PCR for human <i>H. influenzae</i> , <i>S. pneumoniae</i> , <i>M. catarrhalis</i> negative | normal hair cells and spiral ganglia |  | <i>Muc5AC</i> , <i>Muc5B</i> , <i>Tgfb1</i>                                                                          |
| <i>Lmna Dhe/+</i>   | (Zhang et al., 2012)    | <i>LMNA</i> laminopathies includes Hutchinson-Gilford progeria syndrome, pinna & external ear canal anomaly, conductive hearing loss | epidermal dysplasia, craniofacial defects and reduced pinna, hyperphosphataemia and increased calcium x phosphate product in female mutants | fused basicranium                          | increased lateral angulation, increased width of bony segment more horizontal | mucosal thickening increased goblet cells, haemorrhage, erythrophagocytosis, cholesterol granuloma, abscessation |                                                                                                                                           |                                      |  | bullae <i>Tnfa</i> , <i>NF-kB</i> , <i>Tgfa</i> expression increased, functional assay peritoneal macrophages normal |

|                                     |                           |                                           |                                                                                                           |                                    |                                    |                                                                                         |                                  |               |                                                   |
|-------------------------------------|---------------------------|-------------------------------------------|-----------------------------------------------------------------------------------------------------------|------------------------------------|------------------------------------|-----------------------------------------------------------------------------------------|----------------------------------|---------------|---------------------------------------------------|
| <i>Ets1</i> +/- and <i>Fli1</i> +/- | (Carpinelli et al., 2015) | Jacobsen syndrome                         | <i>Ets1</i> perinatal mortality, <i>Ets</i> and <i>Fli1</i> thrombocytopenia                              | short nasal bone, malformed septum |                                    | inflamed mucosa, small bullae, deformed stapes                                          |                                  | none detected |                                                   |
| <i>Mcp1 tm1a/tm1a</i>               | (Chen et al., 2013)       | Microcephaly and mental retardation       | homozygotes infertile, ocular abnormalities, increased B cells & micronucleated normochromic erythrocytes | small skull                        | normal                             | thickened mucoperiosteum                                                                | <i>Streptococcus sp.</i>         |               | cilia defect suspected                            |
| <i>Eya4</i> -/-                     | (Depreux et al., 2008)    | sensoineural hearing loss, cardiomyopathy |                                                                                                           | none reported                      | reduced size, malposition          | reduced bulla size, mucosal hyperplasia, reduced cilia, increased goblet cells          |                                  |               | azithromycin treatment has no effect on phenotype |
| <i>Phex Hyp-Duk/Y</i>               | (Han et al., 2012)        | X-linked hypophosphatemic rickets         | small body size and short tail                                                                            | slightly abnormal skull shape      | hyperplasia of ciliated epithelium | increased goblet cells, reduced ciliated cells, overlaid by patches mucin-like material | <i>Staph. coagulase negative</i> |               |                                                   |

| <b>Anatomical defects</b>      |                                  |  |                                                                    |                                                   |                                                                                                 |                                                                                                 |                                                    |                              |                                      |
|--------------------------------|----------------------------------|--|--------------------------------------------------------------------|---------------------------------------------------|-------------------------------------------------------------------------------------------------|-------------------------------------------------------------------------------------------------|----------------------------------------------------|------------------------------|--------------------------------------|
| <i>Rpl38</i> Ts/+              | (Noben-Trauth and Latoche, 2011) |  | skeletal abnormality, short misshapen tail, hyperphosphataemia     | shortened nose                                    | enlarged                                                                                        | polyps, cholesterol granuloma, mineralization, ectopic calcification, osteogenesis              | <i>Staphylococcus</i> spp, <i>Enterococcus</i> sp. | no abnormality               | rescued by Rpl38 cDNA                |
| <i>Sh3pxd2b</i> nee homozygote | (Yang et al., 2011)              |  | glaucoma, growth retardation, adipose deficits, hearing impairment | domed head, rounded skull, short maxilla and nose | inflammatory cells in ET lumen, increased lateral with concurrent reduced horizontal angulation | thickened fibrous mucosa with increased goblet cells and decreased ciliated cells, TM thickened |                                                    | inner ear inflammation minor | increased <i>Tnf</i> and <i>Tlr2</i> |

| <b>TGF-β signalling pathway</b> |                                                       |                   |                                                                                  |                                         |                                                 |                                                                                                         |  |                                                                    |                                        |
|---------------------------------|-------------------------------------------------------|-------------------|----------------------------------------------------------------------------------|-----------------------------------------|-------------------------------------------------|---------------------------------------------------------------------------------------------------------|--|--------------------------------------------------------------------|----------------------------------------|
| <i>Fbxo11</i> Jf/+              | (Hardisty et al., 2003, Hardisty-Hughes et al., 2006) |                   | homozygote cleft palate, eyelids open at birth, heterozygotes growth retardation | short snout                             | New-born and d50 mice ET narrowed and misshapen | bullae reduced size, mucosa dilated capillaries & lymphatics, polyps, calcification in mice > 11 months |  | abnormal endocochlear potentials, possible impaired stria function |                                        |
| <i>Tgif</i> -/-                 | (Tateossian et al., 2013)                             | holoprosencephaly | homozygote placental defect and minor hydrocephalus                              | minor skull shortening and reduced size | normal acute angle to nasopharynx               | thickened mucoperiosteum, increased goblet cells                                                        |  | none at 2 months                                                   | bullae fluids elevated MMP, VEGF, TNFα |



|  |  |  |                    |  |  |  |  |  |  |
|--|--|--|--------------------|--|--|--|--|--|--|
|  |  |  | s, growth retarded |  |  |  |  |  |  |
|--|--|--|--------------------|--|--|--|--|--|--|

| Innate immunity              |                                                                                                                              |  |                                                                         |  |                                                   |                                                                                   |                                                                                                          |                                              |                                                                        |
|------------------------------|------------------------------------------------------------------------------------------------------------------------------|--|-------------------------------------------------------------------------|--|---------------------------------------------------|-----------------------------------------------------------------------------------|----------------------------------------------------------------------------------------------------------|----------------------------------------------|------------------------------------------------------------------------|
| <i>Mecom (Evi1) Jbo/+</i>    | (Azar et al., 2016, Bhutta et al., 2014, Cheeseman et al., 2011, Hood et al., 2016, Parkinson et al., 2006, Xu et al., 2012) |  | extra digit, derepression of NF-kB signalling                           |  |                                                   | mucosa thickened polyps, vascularization                                          | <i>Staph</i> sp., <i>Staph aureus</i> , <i>Proteus mirabilis</i> , <i>E. coli</i> , <i>Moraxella</i> sp. |                                              | bullae fluids elevated cytokines and VEGF. experimental NTHi infection |
| <i>Tlr4 Lps-d/Lps-d</i>      | MacArthur et al., 2006                                                                                                       |  |                                                                         |  | lumen filled by exudate                           | mucosal fibrosis, granulation tissue, vascularization and bullae bone remodelling |                                                                                                          | round window and organ of Corti inflammation |                                                                        |
| <i>BpifA1 (Splunc-1) -/-</i> | (Bartlett et al., 2015)                                                                                                      |  |                                                                         |  | normal                                            | mucosal thickening and polyps, TM thickened, mucopurulent OM                      | special stains for bacteria and fungi negative                                                           |                                              |                                                                        |
| <i>Dbh -/-</i>               | (Maison et al., 2010)                                                                                                        |  | absence of measurable epinephrine / norepinephrine, altered metabolism, |  | loss adrenergic modulation auditory tube function | exudate or fibrous tissue in the vicinity of the round window, thickening         |                                                                                                          | physiological changes                        | susceptibility to infection via compromised local and systemic         |

|                   |                       |  |                                                                                                          |  |  |                                                                                                                |                    |                |                      |
|-------------------|-----------------------|--|----------------------------------------------------------------------------------------------------------|--|--|----------------------------------------------------------------------------------------------------------------|--------------------|----------------|----------------------|
|                   |                       |  | thermoregulation, cardiovascular tone, maternal behaviour. Deficits in motor function, learning & memory |  |  | round window                                                                                                   |                    |                | immune cell function |
| <i>Isl1Drsh/+</i> | (Hilton et al., 2011) |  |                                                                                                          |  |  | mucosa thickened by granulation tissue, mucosa and tympanic membrane vascularised, fusion of malleus and incus | <i>Proteus</i> sp. | no abnormality |                      |

| Miscellaneous |                           |                   |                                                                                      |  |  |                                                  |  |  |  |
|---------------|---------------------------|-------------------|--------------------------------------------------------------------------------------|--|--|--------------------------------------------------|--|--|--|
| <i>Nf2</i> KO | (Giovannini et al., 2000) | neurofibromatosis | osteosarcoma, molar eruption delayed or absent, growth retardation, reduced survival |  |  | otitis media present but not described in detail |  |  |  |

|                  |                          |  |  |  |  |                                                                              |                                                                                                                          |  |                                              |
|------------------|--------------------------|--|--|--|--|------------------------------------------------------------------------------|--------------------------------------------------------------------------------------------------------------------------|--|----------------------------------------------|
| <i>Oxgr1</i> -/- | (Kerschner et al., 2013) |  |  |  |  | mucosal fibrosis, haemosiderin laden macrophages, mineralization of ossicles | Gram stains for bacteria & PCR for human otopathogens <i>H. influe</i> , <i>S.pneumo</i> , <i>M. catarr</i> are negative |  | upregulation of <i>Muc5B</i> , <i>Muc 19</i> |
|------------------|--------------------------|--|--|--|--|------------------------------------------------------------------------------|--------------------------------------------------------------------------------------------------------------------------|--|----------------------------------------------|

### References for table S1

- Azar, A., Piccinelli, C., Brown, H., Headon, D. & Cheeseman, M. (2016). Ectodysplasin signalling deficiency in mouse models of hypohidrotic ectodermal dysplasia leads to middle ear and nasal pathology. *Hum Mol Genet*.
- Bartlett, J. A., Meyerholz, D. K., Wohlford-Lenane, C. L., Naumann, P. W., Salzman, N. H. & Mccray, P. B., Jr. (2015). Increased susceptibility to otitis media in a Splunc1-deficient mouse model. *Dis Model Mech*, 8, 501-8.
- Bhutta, M. F., Cheeseman, M. T. & Brown, S. D. (2014). Myringotomy in the Junbo mouse model of chronic otitis media alleviates inflammation and cellular hypoxia. *Laryngoscope*, 124, E377-E383.
- Bhutta, M. F., Cheeseman, M. T., Herault, Y., Yu, Y. E. & Brown, S. D. (2013). Surveying the Down syndrome mouse model resource identifies critical regions responsible for chronic otitis media. *Mamm Genome*, 24, 439-45.
- Biechele, S., Adissu, H. A., Cox, B. J. & Rossant, J. (2013). Zygotic Porcn paternal allele deletion in mice to model human focal dermal hypoplasia. *PLoS One*, 8, e79139.
- Carpinelli, M. R., Kruse, E. A., Arhatari, B. D., Debrincat, M. A., Ogier, J. M., Bories, J. C., Kile, B. T. & Burt, R. A. (2015). Mice Haploinsufficient for Ets1 and Fli1 Display Middle Ear Abnormalities and Model Aspects of Jacobsen Syndrome. *Am J Pathol*, 185, 1867-76.
- Cheeseman, M. T., Tyrer, H. E., Williams, D., Hough, T. A., Pathak, P., Romero, M. R., Hilton, H., Bali, S., Parker, A., Vizor, L., et al. (2011). HIF-VEGF Pathways Are Critical for Chronic Otitis Media in Junbo and Jeff Mouse Mutants. *PLoS Genet*, 7, e1002336.
- Chen, J., Ingham, N., Clare, S., Raisen, C., Vancollie, V. E., Ismail, O., Mcintyre, R. E., Tsang, S. H., Mahajan, V. B., Dougan, G., et al. (2013). Mcph1-deficient mice reveal a role for MCPH1 in otitis media. *PLoS One*, 8, e58156.

- Depreux, F. F., Darrow, K., Conner, D. A., Eavey, R. D., Liberman, M. C., Seidman, C. E. & Seidman, J. G. (2008). Eya4-deficient mice are a model for heritable otitis media. *J Clin Invest*, 118, 651-8.
- Fuchs, J. C., Zinnamon, F. A., Taylor, R. R., Ivins, S., Scambler, P. J., Forge, A., Tucker, A. S. & Linden, J. F. (2013). Hearing loss in a mouse model of 22q11.2 Deletion Syndrome. *PLoS One*, 8, e80104.
- Giovannini, M., Robanus-Maandag, E., Van Der Valk, M., Niwa-Kawakita, M., Abramowski, V., Goutebroze, L., Woodruff, J. M., Berns, A. & Thomas, G. (2000). Conditional biallelic Nf2 mutation in the mouse promotes manifestations of human neurofibromatosis type 2. *Genes Dev*, 14, 1617-30.
- Han, F., Yu, H., Li, P., Zhang, J., Tian, C., Li, H. & Zheng, Q. Y. (2012). Mutation in Phex gene predisposes BALB/c-Phex(Hyp-Duk)/Y mice to otitis media. *PLoS One*, 7, e43010.
- Han, F., Yu, H., Zhang, J., Tian, C., Schmidt, C., Nava, C., Davisson, M. T. & Zheng, Q. Y. (2009). Otitis media in a mouse model for Down syndrome. *Int J Exp Pathol*, 90, 480-8.
- Hardisty, R. E., Erven, A., Logan, K., Morse, S., Guionaud, S., Sancho-Oliver, S., Hunter, A. J., Brown, S. D. & Steel, K. P. (2003). The deaf mouse mutant Jeff (Jf) is a single gene model of otitis media. *J Assoc Res Otolaryngol*, 4, 130-8.
- Hardisty-Hughes, R. E., Tateossian, H., Morse, S. A., Romero, M. R., Middleton, A., Tymowska-Lalanne, Z., Hunter, A. J., Cheeseman, M. & Brown, S. D. (2006). A mutation in the F-box gene, Fbxo11, causes otitis media in the Jeff mouse. *Hum Mol Genet*, 15, 3273-9.
- Heldermon, C. D., Hennig, A. K., Ohlemiller, K. K., Ogilvie, J. M., Herzog, E. D., Breidenbach, A., Vogler, C., Wozniak, D. F. & Sands, M. S. (2007). Development of sensory, motor and behavioral deficits in the murine model of Sanfilippo syndrome type B. *PLoS ONE*, 2, e772.
- Hilton, J. M., Lewis, M. A., Grati, M., Ingham, N., Pearson, S., Laskowski, R. A., Adams, D. J. & Steel, K. P. (2011). Exome sequencing identifies a missense mutation in Isl1 associated with low penetrance otitis media in dearisch mice. *Genome Biol*, 12, R90.
- Hong, S. H., Chu, H., Kim, K. R., Ko, M. H., Kwon, S. Y., Moon, I. J., Chung, W. H., Cho, Y. S., Kim, C. H., Suh, M. W., et al. (2012). Auditory characteristics and therapeutic effects of enzyme replacement in mouse model of the mucopolysaccharidosis (MPS) II. *Am J Med Genet A*, 158A, 2131-8.
- Hood, D., Moxon, R., Purnell, T., Richter, C., Williams, D., Azar, A., Crompton, M., Wells, S., Fray, M., Brown, S. D., et al. (2016). A new model for non-typeable Haemophilus influenzae middle ear infection in the Junbo mutant mouse. *Dis Model Mech*, 9, 69-79.
- Ibanez-Tallon, I., Gorokhova, S. & Heintz, N. (2002). Loss of function of axonemal dynein Mdnah5 causes primary ciliary dyskinesia and hydrocephalus. *Hum Mol Genet*, 11, 715-21.
- Kerschner, J. E., Hong, W., Taylor, S. R., Kerschner, J. A., Khamphang, P., Wrege, K. C. & North, P. E. (2013). A novel model of spontaneous otitis media with effusion (OME) in the Oxgr1 knock-out mouse. *Int J Pediatr Otorhinolaryngol*, 77, 79-84.

- Kunimoto, K., Yamazaki, Y., Nishida, T., Shinohara, K., Ishikawa, H., Hasegawa, T., Okanou, T., Hamada, H., Noda, T., Tamura, A., et al. (2012). Coordinated ciliary beating requires Odf2-mediated polarization of basal bodies via basal feet. *Cell*, 148, 189-200.
- Li, X., Xu, L., Li, J., Li, B., Bai, X., Strauss, J. F., 3rd, Zhang, Z. & Wang, H. (2014). Otitis media in sperm-associated antigen 6 (Spag6)-deficient mice. *PLoS One*, 9, e112879.
- Liao, J., Kochilas, L., Nowotschin, S., Arnold, J. S., Aggarwal, V. S., Epstein, J. A., Brown, M. C., Adams, J. & Morrow, B. E. (2004). Full spectrum of malformations in velo-cardio-facial syndrome/DiGeorge syndrome mouse models by altering Tbx1 dosage. *Hum Mol Genet*, 13, 1577-85.
- Lucas, J. S., Adam, E. C., Goggin, P. M., Jackson, C. L., Powles-Glover, N., Patel, S. H., Humphreys, J., Fray, M. D., Falconnet, E., Blouin, J. L., et al. (2012). Static respiratory cilia associated with mutations in Dnahc11/DNAH11: a mouse model of PCD. *Hum Mutat*, 33, 495-503.
- Macarthur, C. J., Hefeneider, S. H., Kempton, J. B. & Trune, D. R. (2006). C3H/HeJ mouse model for spontaneous chronic otitis media. *Laryngoscope*, 116, 1071-9.
- Maison, S. F., Le, M., Larsen, E., Lee, S. K., Rosowski, J. J., Thomas, S. A. & Liberman, M. C. (2010). Mice lacking adrenergic signaling have normal cochlear responses and normal resistance to acoustic injury but enhanced susceptibility to middle-ear infection. *J Assoc Res Otolaryngol*, 11, 449-61.
- Noben-Trauth, K. & Latoche, J. R. (2011). Ectopic mineralization in the middle ear and chronic otitis media with effusion caused by RPL38 deficiency in the Tail-short (Ts) mouse. *J Biol Chem*, 286, 3079-93.
- Parkinson, N., Hardisty-Hughes, R. E., Tateossian, H., Tsai, H. T., Brooker, D., Morse, S., Lalane, Z., Mackenzie, F., Fray, M., Glenister, P., et al. (2006). Mutation at the Evi1 locus in Junbo mice causes susceptibility to otitis media. *PLoS Genet*, 2, e149.
- Schachern, P. A., Cureoglu, S., Tsuprun, V., Paparella, M. M. & Whitley, C. B. (2007). Age-related functional and histopathological changes of the ear in the MPS I mouse. *Int J Pediatr Otorhinolaryngol*, 71, 197-203.
- Schmidt-Ullrich, R., Aebischer, T., Hulsken, J., Birchmeier, W., Klemm, U. & Scheidereit, C. (2001). Requirement of NF-kappaB/Rel for the development of hair follicles and other epidermal appendices. *Development*, 128, 3843-53.
- Tateossian, H., Morse, S., Parker, A., Mburu, P., Warr, N., Acevedo-Arozana, A., Cheeseman, M., Wells, S. & Brown, S. D. (2013). Otitis media in the Tgif knockout mouse implicates TGFbeta signalling in chronic middle ear inflammatory disease. *Hum Mol Genet*, 22, 2553-65.
- Tian, C., Yu, H., Yang, B., Han, F., Zheng, Y., Bartels, C. F., Schelling, D., Arnold, J. E., Scacheri, P. C. & Zheng, Q. Y. (2012). Otitis Media in a New Mouse Model for CHARGE Syndrome with a Deletion in the Chd7 Gene. *PLoS ONE*, 7, e34944.

- Vogel, P., Read, R. W., Hansen, G. M., Payne, B. J., Small, D., Sands, A. T. & Zambrowicz, B. P. (2012). Congenital hydrocephalus in genetically engineered mice. *Vet Pathol*, 49, 166-81.
- Vogler, C., Levy, B., Galvin, N., Sands, M. S., Birkenmeier, E. H., Sly, W. S. & Barker, J. (2001). A novel model of murine mucopolysaccharidosis type VII due to an intracisternal alpha particle element transposition into the beta-glucuronidase gene: clinical and pathologic findings. *Pediatr Res*, 49, 342-8.
- Voronina, V. A., Takemaru, K., Treuting, P., Love, D., Grubb, B. R., Hajjar, A. M., Adams, A., Li, F. Q. & Moon, R. T. (2009). Inactivation of Chibby affects function of motile airway cilia. *J Cell Biol*, 185, 225-33.
- Warren, M., Wang, W., Spiden, S., Chen-Murphy, D., Tannahill, D., Steel, K. P. & Bradley, A. (2007). A Sall4 mutant mouse model useful for studying the role of Sall4 in early embryonic development and organogenesis. *Genesis*, 45, 51-8.
- Xu, X., Woo, C. H., Steere, R. R., Lee, B. C., Huang, Y., Wu, J., Pang, J., Lim, J. H., Xu, H., Zhang, W., et al. (2012). EVI1 Acts as an Inducible Negative-Feedback Regulator of NF-kappaB by Inhibiting p65 Acetylation. *J Immunol*, 188, 6371-80.
- Yang, A., Walker, N., Bronson, R., Kaghad, M., Oosterwegel, M., Bonnin, J., Vagner, C., Bonnet, H., Dikkes, P., Sharpe, A., et al. (2000). p73-deficient mice have neurological, pheromonal and inflammatory defects but lack spontaneous tumours. *Nature*, 404, 99-103.
- Yang, B., Tian, C., Zhang, Z. G., Han, F. C., Azem, R., Yu, H., Zheng, Y., Jin, G., Arnold, J. E. & Zheng, Q. Y. (2011). Sh3pxd2b mice are a model for craniofacial dysmorphology and otitis media. *PLoS ONE*, 6, e22622.
- Zhang, Y., Yu, H., Xu, M., Han, F., Tian, C., Kim, S., Fredman, E., Zhang, J., Benedict-Alderfer, C. & Zheng, Q. Y. (2012). Pathological Features in the Lmna(Dhe/+) Mutant Mouse Provide a Novel Model of Human Otitis Media and Laminopathies. *Am J Pathol*.
